# Supplementary material
Source: PubMed Central journal article supplement (PMC11232033)
Supplement: NIHMS1863186-supplement-1.pdf [file NIHMS1863186-supplement-1.pdf]

**Supplemental Figure 1 – CONSORT diagram of patients included neoadjuvant targeted therapy trials**

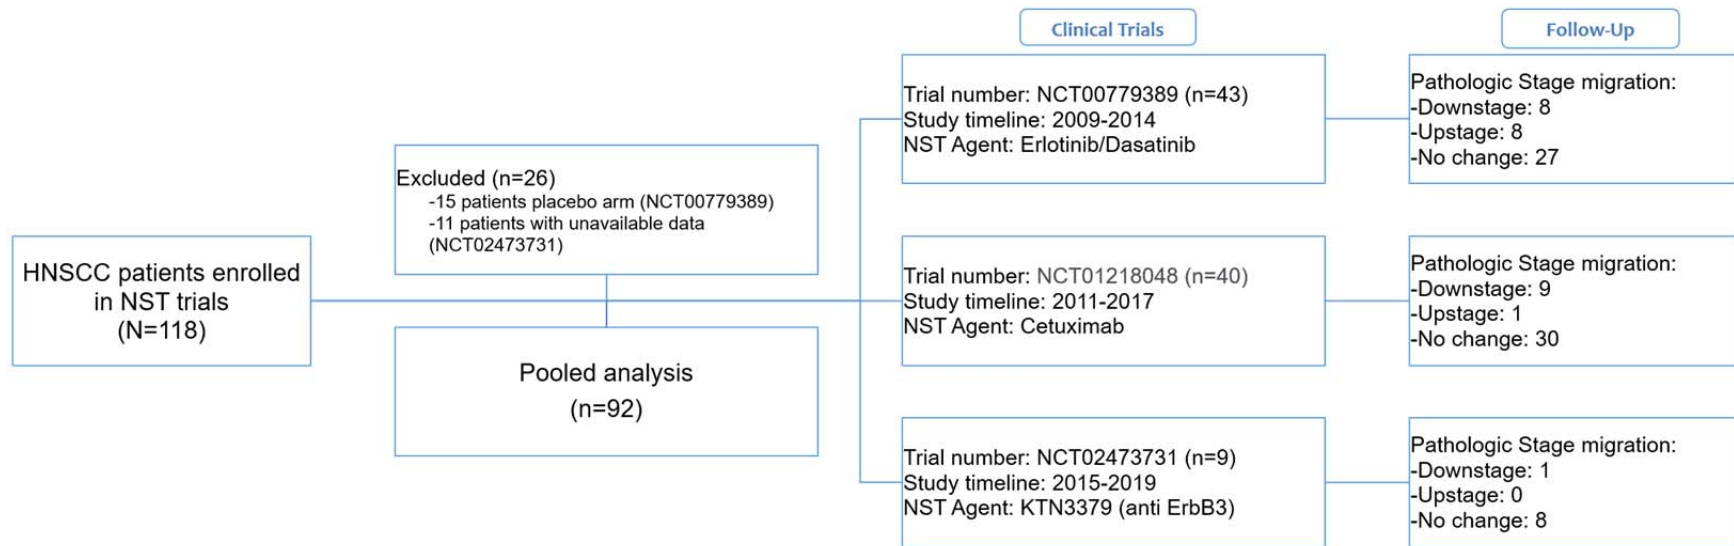

CONSORT diagram of operable HNSCC patients included in the three neoadjuvant systemic therapy clinical trials. NST: neoadjuvant systemic therapy.
